# A prominent requirement for *single-minded* and the ventral midline in patterning the dorsoventral axis of the crustacean *Parhyale hawaiiensis*

Mario A. Vargas-Vila<sup>1</sup>, Roberta L. Hannibal<sup>1</sup>, Ronald J. Parchem<sup>1</sup>, Paul Z. Liu<sup>1,2</sup> and Nipam H. Patel<sup>1,2,\*</sup>

## SUMMARY

In bilaterians, establishing the correct spatial positioning of structures along the dorsoventral (DV) axis is essential for proper embryonic development. Insects such as *Drosophila* rely on the Dorsal activity gradient and Bone morphogenetic protein (BMP) signaling to establish cell fates along the DV axis, leading to the distinction between tissues such as mesoderm, neurogenic ectoderm and dorsal ectoderm in the developing embryo. Subsequently, the ventral midline plays a more restricted role in DV patterning by establishing differential cell fates in adjacent regions of the neurogenic ectoderm. In this study, we examine the function of the ventral midline and the midline-associated gene *single-minded* (*Ph-sim*) in the amphipod crustacean *Parhyale hawaiiensis*. Remarkably, we found that *Ph-sim* and the ventral midline play a central role in establishing proper fates along the entire DV axis in this animal; laser ablation of midline cells causes a failure to form neurogenic ectoderm and *Ph-sim* RNAi results in severely dorsalized embryos lacking both neurogenic ectoderm and the appendage-bearing lateral ectoderm. Furthermore, we hypothesize that this role of midline cells was present in the last common ancestor of crustaceans and insects. We predict that the transition to a Dorsal-dependent DV patterning system in the phylogenetically derived insect lineage leading to *Drosophila* has led to a more restricted role of the ventral midline in patterning the DV axis of these insects.

**KEY WORDS:** *Parhyale hawaiiensis*, RNAi, Dorsoventral patterning, Laser ablation, Single-minded, Ventral midline

## INTRODUCTION

The organization of tissues along the dorsoventral (DV) axis is well conserved in arthropods from the germ band stage through to adulthood: the central nervous system (CNS) occupies the ventral-most region, appendages develop from ventrolateral ectoderm, and the heart is positioned dorsally (Brusca and Brusca, 2003). Prior to the germ band stage, however, basic morphogenetic processes such as gastrulation and germ rudiment assembly vary considerably among arthropods. Therein lies a fundamental question of evolutionary biology: how are various animals able to construct a similar end product when they begin with such vastly different starting materials?

In the fruit fly *Drosophila melanogaster*, DV patterning relies on a broad activity gradient of the maternal transcription factor Dorsal that regulates the expression of various tissue-specific target genes in a threshold-dependent fashion (Roth et al., 1989; Jiang et al., 1992; Stathopoulos et al., 2002). Ventrally, high levels of Dorsal activate *snail* and *twist* in the presumptive mesoderm, whereas intermediate levels activate the Bone morphogenetic protein (BMP) antagonist *short-gastrulation* (*sog*) in the presumptive neurogenic ectoderm (Jiang et al., 1992). Subsequently, secondary DV cell fates, such as the presumptive ventral midline, are established in the embryo. The ventral midline is demarcated by cells expressing the basic helix-loop-helix–Per-ARNT-Sim (bHLH-PAS) transcription factor gene *single-minded* (*sim*), which is directly regulated by Dorsal, Snail and Twist, as well as by Notch signaling at the

mesoderm-mesectoderm boundary (Thomas et al., 1988; Nambu et al., 1991; Kosman et al., 1991; Kasai et al., 1992; Leptin, 1991; Morel and Schweisguth, 2000). Although *sim* expression is first visible at the blastoderm stage in two columns of cells flanking the presumptive mesoderm, these cell columns converge during gastrulation to form a single, ventrally located column of cells (Crews et al., 1988). The ventral midline goes on to play a relatively restricted role in subsequent refinement of DV patterning by secreting the EGF ligand Spitz, which helps to ensure proper fate specification within the adjacent neurogenic ectoderm (Golembo et al., 1996; Mayer and Nüsslein-Volhard, 1988; Chang et al., 2000).

By contrast, distinctions between germ layer lineages in the amphipod crustacean *Parhyale hawaiiensis* are made by the eight-cell stage (Price et al., 2010). In this system, gastrulation occurs as visceral and head mesoderm and germline precursors form an aggregation called the rosette, which is internalized under the developing germ disc. Later, somatic mesodermal precursors ingress along the posterior edge of the germ disc (Price and Patel, 2008). After gastrulation, the germ band for body segments posterior to the mandible consists of an ectodermal grid that is assembled progressively from anterior to posterior (Browne et al., 2005).

Furthermore, whereas specification of *Drosophila* midline cells requires input from Dorsal and mesodermally expressed transcription factors, the ventral midline in amphipods appears to be the first structure to become morphologically and molecularly distinct in the developing germ band (Gerberding and Scholtz, 1999; Browne et al., 2006). Although the ventral midline of *Parhyale* is assembled in the same manner as the rest of the ectodermal grid, it is assembled from a distinct population of precursor cells, termed midline precursor cells, that can be distinguished from the surrounding ectodermal grid precursor cells by their unique morphology (they are arranged in a wedge shape

<sup>1</sup>Department of Molecular and Cell Biology and <sup>2</sup>Department of Integrative Biology, University of California, Berkeley, CA 94720-3200, USA.

\* Author for correspondence (nipam@uclink.berkeley.edu)

in the posterior of the embryo) and their expression of the midline marker *orthodenticle* (*Ph-otd-1*) (Browne et al., 2006). Non-midline ectoderm is derived from three ectodermal blastomeres (EL, ER and EP), whereas midline ectoderm is derived predominantly from EP (Gerberding et al., 2002). Finally, despite the divergent developmental origins of the ventral midline in *Parhyale* and *Drosophila*, the presence of common molecular markers has been used to argue that they are homologous structures (Simanton et al., 2009; Duman-Scheel and Patel, 1999).

Although the Dorsal-dependent DV patterning system seen in *Drosophila* has been well characterized, it is thought to be evolutionarily derived (novel) with respect to other arthropod groups; even within insects, it has been suggested that some groups rely on Dorsal to lesser degrees to pattern the DV axis (Nunes da Fonseca et al., 2008). Meanwhile, other aspects of DV patterning, such as the role of BMP antagonists in specifying neurogenic ectoderm, appear to be well conserved throughout Bilateria (Holley et al., 1995). When considering the evolution of DV patterning, however, one significant omission has been the lack of functional characterization of *sim* and the ventral midline in non-insect arthropods. This is possibly owing to the relatively restricted role that they play in *Drosophila*. As the presence of ventral midline cells in *Parhyale* represents the first visible manifestation of DV differentiation in the ectodermal grid, we sought to characterize the function of *sim* and the ventral midline in the overall organization of the DV axis in this animal. We describe here the basic DV fates in the *Parhyale* embryo, and, through laser ablation of midline cells and knockdown of *sim* expression, we define the role of the midline in patterning the DV axis of the embryo.

## MATERIALS AND METHODS

### Fluorescent live imaging

#### DsRed-NLS

A transgenic line of *Parhyale hawaiiensis* containing the transgene *PhHsp70-DsRed-NLS* was generated by Melinda Modrell in the Patel laboratory as described previously (Pavlopoulos and Averof, 2005). Embryos were raised at 25°C in filtered artificial seawater. To induce DsRed-NLS expression, stage 8-9 embryos were subject to heat shock at 37°C for 1 hour. After several hours, nuclear DsRed fluorescence was visible within the embryos, allowing visualization of cells and facilitating the targeting of midline cells with the laser.

#### Hoechst

Embryos were treated with 10 µg/ml Hoechst 33342 dye (Sigma, St Louis, MO, USA) in artificial sea water for 3 minutes and then washed several times with artificial sea water. Live imaging was carried out by time-lapse videography using Volocity v.5 (Improvision, Waltham, MA, USA) software.

#### Laser ablation

Laser ablations were carried out using a MicroPoint nitrogen pulsed pumping dye laser (Photonic Instruments, St Charles, IL, USA) using a Coumarin 440 dye cell. Embryos were live-mounted in artificial seawater under a glass coverslip. The laser was attenuated using a graded neutral density filter slider to an intensity that could kill cells without generating vapor bubbles in the embryo. Using a 100× oil-immersion objective, individual nuclei were targeted (identification was made possible by DsRed-NLS fluorescence) and the laser was fired for 500 pulses (~4 nseconds/pulse) at a frequency of 20 Hz. DsRed fluorescence rapidly fades in cells after they are hit with the laser, allowing us to verify that each cell was targeted correctly.

#### Cloning

cDNA was generated from mixed stage *Parhyale hawaiiensis* embryos as described previously (Price and Patel, 2008). We cloned *Parhyale* orthologs of *Pax3/7-1* (*Ph-Pax3/7-1*), *prospero* (*Ph-pros*), *single-minded*

(*Ph-sim*), *hedgehog* (*Ph-hh*), and *short gastrulation* (*Ph-sog*) from cDNA using the following degenerate primers (5' to 3'): *Ph-Pax3/7-1* forward GGNGGNGTNTTYATHAAYGG, reverse RTTNSWRAACCANACYTG, nested forward MARATHGTNGARATGGC, nested reverse RTANACRTCNGGRTAYTG; *Ph-pros* forward AARGCNAARY-TNATGTTYTT, reverse TCDATRTGRTTRTNTCKRTRTARTG; *Ph-sim* forward GGCCCGGACGGNAARATHATG, reverse GGCGCGAC-DATRCARTGNGG, nested forward GGCGCGAAGCGNAAYGCNGG, nested reverse GGCTGCGGCTCRANCCNGT; *Ph-hh* forward GTNATGAAYCARTGGCCNGG, reverse TCRTARTANACCCARTC; and *Ph-sog* forward GAYYTNGGNCNCNTTYG, reverse CNCKNCKCCANACNCCRCA, nested forward MRNAAYATH-AARAAYGASTGTCC, nested reverse CCNGGRCANGTYTTGACGA. Additional sequence was obtained using 5' and 3' RACE (Ambion FirstChoice RLM-RACE Kit). New sequences were deposited in GenBank with accession numbers HM347085 (*Ph-Pax3/7-1*), HM191476 (*Ph-pros*), HM191473 (*Ph-sim*), HM347084 (*Ph-hh*) and HM191474 (*Ph-sog*).

### Stealth siRNA design

Double-stranded Stealth siRNAs were designed for *Ph-sim*, *Ph-sog* and *DsRed* (negative control) using the BLOCK-IT RNAi program (Invitrogen, Carlsbad, CA, USA). siRNA sequences were as follows (5' to 3'): *Ph-sim* 29, CACUGCUCGGGAUACCUCAAGAUA; *Ph-sim* 149, GAGAUC-AGAUGCACUCCAACAUGU; *Ph-sim* 661, CAACAUGGACACAU-CACCUUCUUUG; *Ph-sog* 292, CAGUGCGUCUGUGUCUGGU-ACAAA; *Ph-sog* 1049, CACACAAGCUCUUGUCUUCUACA; *Ph-sog* 2024, UGCCUGACGCUUGCUUGCUGAUAA; *DsRed* 56, AGGGCUCGUGAACGGCCACGAGUU; *DsRed* 197, AGUACGGCU-CCAAGGUGUACGUGAA; and *DsRed* 269, GCUUCAAGUGGGAGC-GCGUGAUGAA.

Embryo fixation, histochemical staining and microinjection of siRNAs into single-cell embryos were performed as described previously (Rehm et al., 2009). Some embryos were immersed in boiling water for 1-2 seconds prior to fixation and membrane removal as this allows for faster embryo processing. As boiled embryos retain a spherical shape, we photographed them in multiple focal planes and used Helicon Focus software (Helicon Soft, Kharkov, Ukraine) to generate a single, focused image.

## RESULTS

### DV regionalization in the *Parhyale* trunk

As a first step towards understanding DV patterning in *Parhyale*, we established molecular and morphological markers for the different DV fates in the ectoderm and mesoderm. The ectodermal grid in *Parhyale* contains distinct rows and columns, with the latter giving rise to stereotyped tissues along the DV axis of the embryo. The four basic DV fates observed in the ectoderm, from ventral to dorsal, are (1) the ventral midline (ventral-most cell column), (2) the neurogenic ectoderm, (3) a lateral ectodermal region containing appendage primordia, and (4) the dorsal ectoderm that will contribute to the most dorsal epidermis. A fifth (most dorsal) fate is characterized by loosely arranged extraembryonic epithelium.

The ventral midline (column 0) bisects the embryo and expresses *Ph-otd-1* (Browne et al., 2006) (Fig. 1A). Neurogenic ectoderm, i.e. that which gives rise to neural precursor cells of the CNS, is derived from the midline along with cells from columns 1-3, as shown by studies following the lineage of *Parhyale* neurons expressing Engrailed (Browne et al., 2005). For various arthropods, particular *Pax3/7* orthologs provide a conserved and earlier expressed marker of the neuroectodermal fate, as their expression is seen in segmental stripes confined to the presumptive neuroectoderm (Davis et al., 2005). We cloned a *Parhyale Pax3/7* ortholog (*Ph-Pax3/7-1*) that showed strongest expression in segmental stripes within cell columns 0-2 (low level expression was also detected in columns 3-4) (Fig. 1B). To visualize the developing neurogenic ectoderm in older embryos, we cloned the

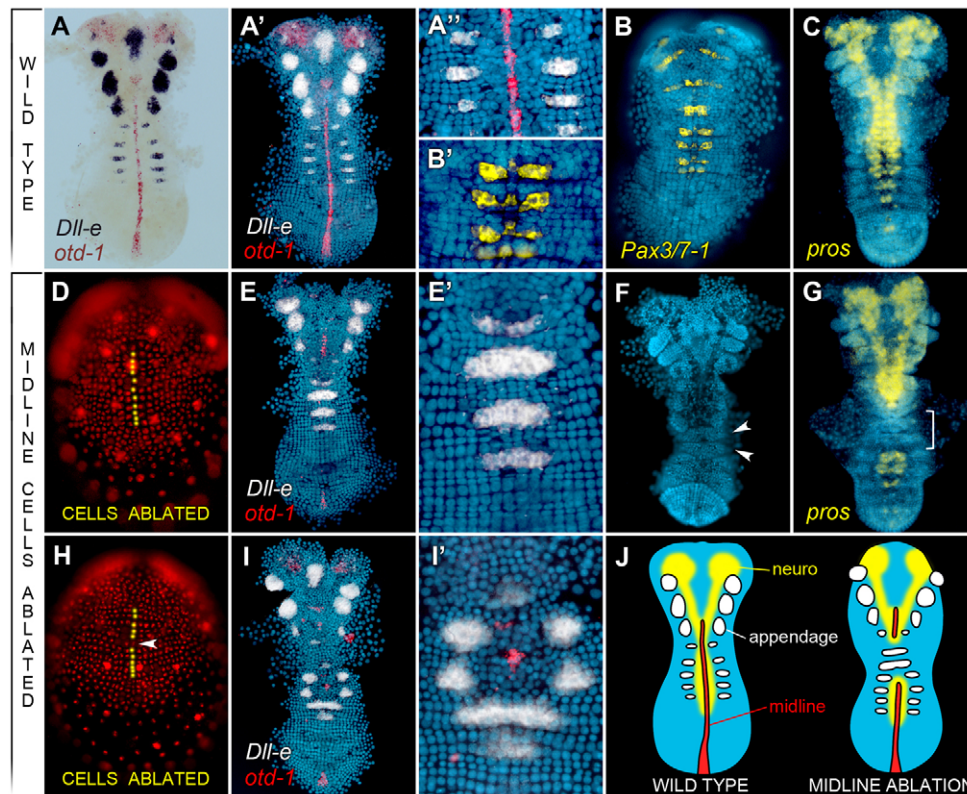

**Fig. 1. Laser ablation of midline cells results in DV mispatterning.** All images are ventral views with the anterior at the top. Nuclei were counterstained with DAPI (blue) and a false-color overlay of gene expression patterns was generated. All embryos shown (as well as in Figs 3,4) were processed in a similar manner. **(A-A'')** Wild-type expression of *Ph-Dll-e* (black or white, as labeled) in appendage primordia and *Ph-otd-1* (red) in midline cells at stage 17. **(B,B')** Wild-type expression of *Ph-Pax3/7-1* (yellow) in a subset of column 0-2-derived cells. **(C)** Wild-type expression of *Ph-pros* (yellow) in neuroblasts and ganglion mother cells at stage 18. **(D)** Living stage 13 embryo visualized by DsRed-NLS fluorescence. Selected midline cells were ablated using a focused laser (yellow dots). **(E,E')** At stage 17, the embryo shown in D shows ventrally fused *Ph-Dll-e* (white) domains in segments lacking midline. *Ph-otd-1* is shown in red. **(F,G)** Two embryos in which midline cells in three consecutive parasegments were ablated at stage 13. By stage 19 (F), ventrally fused limb buds (arrowheads) are visible in segments lacking midline. At stage 18 (G), segments lacking midline show a lack of *Ph-pros* staining (yellow) in affected segments (bracket, T3-T4). **(H)** Trunk midline cells were ablated (yellow dots) at stage 13 except for one midline cell in parasegment 4 (arrowhead). **(I,I')** The embryo from H is shown at stage 17. *Ph-Dll-e* (white) is expressed at a reproducible distance from midline cell clone (large red cell cluster). Note that some scattered red signal is visible; this is associated with debris and does not represent *Ph-otd-1* hybridization signal. **(J)** Illustration of DV fates in wild-type and midline-ablated embryos including midline (red), presumptive neurogenic ectoderm (yellow) and presumptive appendages (white).

*Parhyale prospero* homolog (*Ph-pros*) as this gene is expressed in neuroblasts and ganglion mother cells in an evolutionarily conserved fashion (Doe et al., 1991; Oliver et al., 1993). As each body segment matured, *Ph-pros* expression was seen in neural cells in the ventral regions of the embryo (Fig. 1C). Flanking the neurogenic ectoderm are appendage primordia, revealed molecularly by the conserved appendage-patterning gene *Distal-less* (*Ph-Dll-e*) (Panganiban et al., 1995; Liubicich et al., 2009). *Ph-Dll-e* expression was first seen in segmental stripes within cell columns 3-5 (Fig. 1A). Dorsal ectoderm consists of the most lateral cells within the grid and did not express any of the above-mentioned genes.

DV regionalization is also observed in the mesoderm of early *Parhyale* embryos. In the first thoracic segment and posteriorly, mesoderm initially consists of a transverse row of eight mesoblast cells per segment (with four cells on either side of the midline) (Price and Patel, 2008). These mesoblast cells divide along the anteroposterior (AP) axis to form two rows of eight daughter cells per segment, at which point *twist* (*Ph-twi*) is expressed bilaterally in the anterior daughters of the column 2

mesodermal cells (m2a) (Price and Patel, 2008). Additionally, using an antibody raised against the *Parhyale* Even skipped protein (Ph-Eve), we observed that Ph-Eve is expressed bilaterally in the anterior daughters of the dorsal-most mesoblast cells (m4a) (Fig. 4K). This expression pattern is reminiscent of the segmentally repeated clusters of Eve-positive cells observed in the dorsal-most mesoderm in *Drosophila* that contribute to the larval heart and dorsal somatic muscles (Frasch et al., 1987). In the following sections, we will use these ectodermal and mesodermal DV marker genes to illustrate the effects of laser ablation and *Ph-sim* knockdown on DV patterning in the *Parhyale* embryo.

### The ventral midline is required to specify ventral fates in *Parhyale* trunk

To investigate the potential patterning role of ventral midline cells in *Parhyale*, we performed laser ablations of these cells in developing embryos. This technique can be used to kill specific cells in the living embryo without causing peripheral damage to neighboring cells. Within 2-3 hours of ablation, targeted cells are

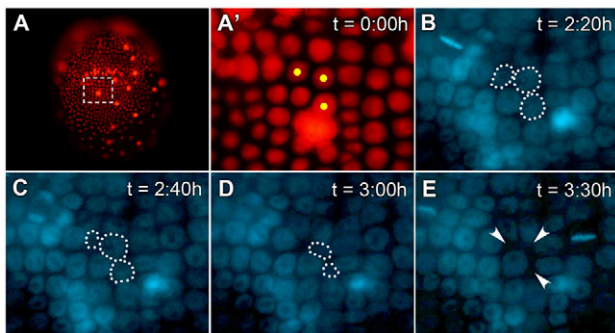

**Fig. 2. Visualization of cell death following laser ablation.**

(A) Living stage 13 embryo visualized by DsRed-NLS fluorescence. (A') Magnification of the region indicated in A. Cells marked with yellow dots were targeted for laser ablation. (B-E) Two hours after ablation, the embryo was treated with Hoechst dye and recorded by fluorescent time-lapse videography. Times shown represent total time elapsed (t) since ablation. Ablated cells have dotted outlines. (E) By 3:30 hours after ablation, all three targeted cells were no longer visible by Hoechst fluorescence. The space previously occupied by these cells (arrowheads) was minimized as surrounding cells moved in to fill the gaps.

absorbed into the yolk and are no longer visible by Hoechst fluorescence, whereas untargeted cells appear to be unaffected (Fig. 2).

When ventral midline cells were ablated at developmental stage 13, a localized defect in both *Ph-Dll-e* and *Ph-pros* expression was observed by stage 17. In segments lacking ventral midline cells, *Ph-Dll-e*-expressing domains were shifted ventrally to produce a single domain of expression (Fig. 1D,E). Accordingly, by stage 19, segments lacking midline formed a single ventrally fused limb bud, whereas non-manipulated segments formed normally positioned, bilateral limb buds (Fig. 1F). We also observed a complete loss of *Ph-pros* expression in segments in which the midline had been ablated, although *Ph-pros* was expressed normally in non-manipulated segments (Fig. 1G). To verify that these results represented a mis-specification of DV cell fates (as opposed to the death of presumptive neuroectodermal cells, for example), we followed midline-ablated embryos by time-lapse videography. Only cells targeted by the laser were observed to die, whereas adjacent cells continued to proliferate (see Movie 1 in the supplementary material). These results suggest that midline cells are required to establish the neurogenic ectoderm (a flanking ventral fate) in surrounding cells. In their absence, cells that would normally be fated as neurogenic ectoderm are transformed to a lateral ectodermal fate. Cells adjacent to the midline (column 1 cells) were ablated as a control and did not produce a similar DV phenotype (data not shown).

To further test the effect of midline cell loss, we ablated the majority of the midline in stage 13 embryos, leaving a single midline cell unablated (Fig. 1H). By stage 17, the progeny of the non-ablated cell had formed a small cluster of *Ph-otd-1*-positive cells. Remarkably, such small clusters of midline cells rescued DV patterning, as seen by *Ph-Dll-e* expression, not only in the segment containing these midline cells, but also in an adjacent segment. *Ph-Dll-e* was still expressed in the appropriate segmental rows, but expression always occurred at a fixed distance from the remaining midline cells (Fig. 1I). This result illustrates that, within the ectoderm, the distance of a cell from the ventral midline appears to be the primary determinant in its decision to adopt a given DV fate.

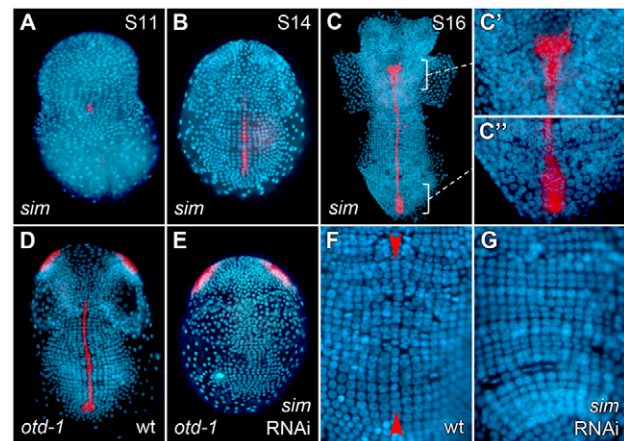

**Fig. 3. *Ph-sim* is expressed in midline cells and is required for midline differentiation.** Nuclei were counterstained with DAPI (blue) and a false-color overlay of gene expression patterns was generated. (A-C) Wild-type expression of *Ph-sim*. (A) Stage 11. *Ph-sim* is first visible in midline cells during initial condensation of germ band. (B) Stage 14. *Ph-sim* is expressed throughout the ventral midline. (C) *Ph-sim* expression at stage 16. (C', C'') Magnification of regions indicated by brackets in C. (C') *Ph-sim* expression is now visible in the second antennal segment in the expanded medial domain. (C'') Magnification showing *Ph-sim* expression in posterior midline precursor cells (not confined to a single column of cells). (D) Wild-type expression of *Ph-otd-1* in midline cells as well as in two domains in the head. (E) *Ph-otd-1* expression in *Ph-sim* RNAi embryo. Midline staining is absent (in 23 out of 24 embryos), whereas staining in the head is unaffected (24 out of 24). (F) Ectodermal grid in wild-type embryo. The ventral midline (red arrowheads) bisects the embryo and is discernible based on morphology. (G) *Ph-sim* RNAi embryo. Midline cells and midline precursor cells are no longer visible.

### ***Ph-sim* is expressed in the ventral midline and is required for midline differentiation**

As a first step towards determining the molecular properties of the ventral midline, we cloned the *Parhyale* ortholog of *single-minded* (*Ph-sim*). In *Drosophila*, *sim* mutants fail to form a functional midline and the mesectodermal cells instead take on the fate of neighboring neuroectodermal cells, whereas ectopic *sim* is sufficient to induce expression of midline genes in a cell-autonomous fashion (Xiao et al., 1996; Nambu et al., 1991).

*Ph-sim* expression was first seen at stage 11 in ventral midline cells, coincident with the initiation of germ band condensation (Fig. 3A). During germ band formation, *Ph-sim* transcript was observed throughout the ventral midline, as well as in the midline precursor cells located in the posterior of the developing germ band (Fig. 3B,C). The anterior boundary of *Ph-sim* is initially coincident with the morphologically visible anterior boundary of midline cells (mandibular segment). By stage 16, we observed an expanded expression domain in the second antennal segment that was not confined to a single column of cells (Fig. 3C').

To test the developmental role of *Ph-sim*, embryonic RNAi was performed. Three individual siRNAs targeting different regions of the *Ph-sim* transcript were used, giving similar results with varying penetrance (Table 1). A combination of two siRNAs (*Ph-sim* 29 and *Ph-sim* 149) produced maximum penetrance and was used to generate the results shown here.

**Table 1. siRNA injection data**

| siRNA                           | No. injected | No. fixed (day 4) | Death (%) | No. scored | Dorsalization phenotype (scored by <i>Ph-Dll-e</i> expression) |          |          |
|---------------------------------|--------------|-------------------|-----------|------------|----------------------------------------------------------------|----------|----------|
|                                 |              |                   |           |            | None                                                           | Moderate | Severe   |
| <i>Ph-sim</i> 29                | 55           | 53                | 3.6       | 45         | 18 (40%)                                                       | 16 (36%) | 11 (24%) |
| <i>Ph-sim</i> 149               | 70           | 69                | 1.4       | 56         | 1 (2%)                                                         | 12 (21%) | 43 (77%) |
| <i>Ph-sim</i> 661               | 63           | 59                | 6.3       | 45         | 23 (51%)                                                       | 5 (11%)  | 17 (38%) |
| <i>Ph-sim</i> 29 + 149          | 193          | 187               | 3.1       | 49         | 1 (2%)                                                         | 4 (8%)   | 44 (90%) |
| <i>Ph-sog</i> 292 + 1049 + 2024 | 181          | 120               | 34        | 85         | 85 (100%)                                                      | 0        | 0        |
| <i>DsRed</i> 56 + 197 + 269     | 56           | 53                | 5.4       | 18         | 18 (100%)                                                      | 0        | 0        |

A 5:1 mixture of siRNA (at 100  $\mu$ M each) and Phenol Red dye (~50  $\mu$ l) was injected into single-cell *Parhyale* embryos. At day 4 of embryonic development, embryos were fixed by submersion in boiling deionized water for 1-2 seconds and stained for *Ph-Dll-e* expression. The table lists the number of embryos injected for each siRNA (or combination of siRNAs), the number of embryos fixed at day 4 of development, percentage death (up to day 4), total number of embryos scored for *Ph-Dll-e* expression, and the number of scored embryos showing no phenotype, a moderate dorsalization phenotype (see Fig. 4C), or a severe dorsalization phenotype (see Fig. 4B). The 44 embryos injected with *Ph-sim* 29 + 149 that showed a severe dorsalization phenotype were scored for the severity of DV mispatterning in the second antennal segment (see Fig. 5). siRNAs targeting *Ph-sog* failed to produce a DV phenotype. siRNAs targeting *DsRed* were injected as a negative control and did not produce a DV phenotype.

*Ph-sim* RNAi embryos lacked expression of the midline marker *Ph-otd-1* in the ectodermal grid, whereas expression in the head was unaffected (Fig. 3E). When visualized by DAPI fluorescence, the midline in wild-type embryos can be identified by its distinctive morphology; midline cells are initially smaller and slightly recessed from the plane of the ectodermal grid (Fig. 3F). In *Ph-sim* RNAi embryos, however, no midline cells could be identified (Fig. 3G). These results suggest a failure to differentiate ventral midline cells in *Ph-sim* RNAi embryos, as well as implicating a conserved role for this gene in specifying the midline fate in *Parhyale*.

### ***Ph-sim* RNAi causes severe dorsalization of the embryonic trunk**

A small number of *Ph-sim* RNAi embryos (4 out of 49) showed a moderate dorsalization phenotype, similar to that seen in our midline ablation experiments; the ventral neuroectodermal fate was lost in these embryos and the more dorsal appendage fate was shifted to occupy the ventral-most cells in the germ band (Fig. 4C,D). In these embryos, one or more segments showed a single ventral domain of *Ph-Dll-e* expression. However, the majority of *Ph-sim* RNAi embryos (44 out of 49) displayed a more severe dorsalization phenotype. In these embryos, no *Ph-Dll-e* expression was observed posterior to the second antennal segment (Fig. 4B). In some embryos, the second antennal appendage buds were fused ventrally (Fig. 5C) or were missing altogether (Fig. 5B). Additionally, *Ph-sim* RNAi embryos failed to express the early presumptive neuroectodermal marker *Ph-Pax3/7-1* posterior to the second antennal segment, confirming the failure to specify this tissue (Fig. 4F).

We interpret the lack of *Ph-Dll-e* and *Ph-Pax3/7-1* expression in the developing germ band as a complete transformation of the ectodermal grid to the dorsal ectoderm fate (dorsal ectoderm is the only tissue that fails to express both genes in the wild-type embryo). Although we have not identified any positive markers for dorsal ectoderm, Ph-Eve is a robust marker of the dorsal mesoderm. In wild-type embryos, Ph-Eve was detected in the m4a mesodermal cell and its progeny, and was visible at stage 19 in small clusters of cells at the periphery (dorsal-most regions) of the embryo (Fig. 4I). In *Ph-sim* RNAi embryos, however, Ph-Eve expression was seen in a larger number of cells traversing the ventral-most regions of the embryo (Fig. 4J). To show that this was a result of ectopic Ph-Eve expression rather than increased proliferation of m4a, we looked in stage 17 embryos at segments in which the mesoderm still consisted of 16 cells (immediately following the first division of mesoblast cells). At this stage, *Ph-sim* RNAi embryos showed ectopic expression of Ph-Eve in more

ventral mesoblast daughter cells (21 out of 23), and, occasionally, in all four anterior daughter cells (m1a-m4a) on a given side of the embryo (2 out of 23) (Fig. 3L). This result further supports the hypothesis that ventral and lateral tissues transform to a dorsal fate in *Ph-sim* RNAi embryos. Additionally, the ventral midline appears to be either directly or indirectly involved in generating DV pattern in both the ectodermal and mesodermal germ layers. We also observed that the ectodermal grid in *Ph-sim* RNAi embryos frequently appeared narrower than that seen in wild-type embryos. We interpret this as an expansion of dorsal extra-embryonic tissues, which is likely to be a consequence of overall dorsalization of the DV axis.

Finally, we looked at the effect of *Ph-sim* RNAi on segmental (AP) patterning using the segment polarity gene *hedgehog*. We cloned the *Parhyale* ortholog (*Ph-hh*) and observed that it was expressed in segmental stripes in wild-type embryos (Fig. 4G). *Ph-hh* showed similar segmental expression in the developing germ band of *Ph-sim* RNAi embryos, with minor aberrations attributed to the affected morphology of these embryos, suggesting that AP patterning was largely unaffected by the loss of a functional midline (Fig. 4H). siRNAs designed against the fluorescent protein *DsRed* were used as a negative control; *DsRed* RNAi embryos showed no difference in expression of *Ph-otd-1* (8 out of 8), *Ph-Dll-e* (18 out of 18), or *Ph-Pax3/7-1* (8 out of 8) from wild-type embryos (data not shown).

### **Loss of the midline phenotype suggests involvement of BMP antagonists**

Based on the results of our laser ablation experiments, we predicted that the midline produces one or more secreted proteins capable of inducing ventral fates (e.g. neurogenic ectoderm) in the surrounding tissue. Furthermore, comparisons with *Drosophila* and other insects suggest that these secreted proteins are likely to function by antagonizing BMPs. The link between extracellular BMP antagonism and neural specification appears to be widely conserved and has been demonstrated in *Drosophila*, *Tribolium*, the chelicerate *Achaearanea*, and the annelid *Platynereis*, as well as in vertebrate systems (Francois et al., 1994; van der Zee et al., 2006; Akiyama-Oda and Oda, 2006; Denes et al., 2007; Harland, 2000).

*Drosophila* DV patterning involves various secreted proteins that contribute to a BMP activity gradient by the gastrula stage (Little and Mullins, 2006). Among these, the BMP antagonist *short gastrulation (sog)* is activated in the presumptive neuroectoderm via a threshold response to the Dorsal gradient (Jiang et al., 1992) and, interestingly, is also activated in midline cells by *sim* (Zinzen et al., 2006). Furthermore, a *sog* ortholog is expressed in midline

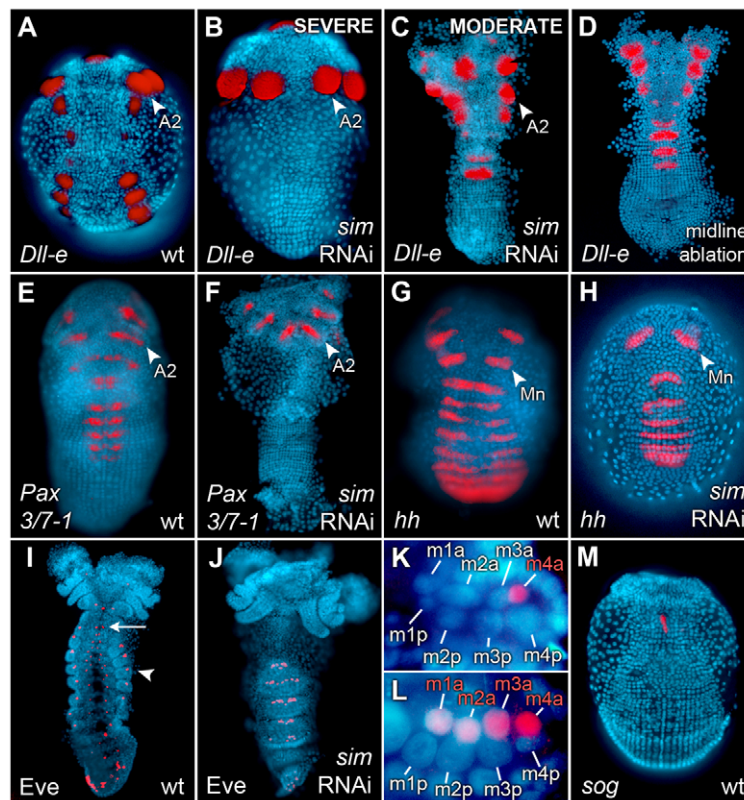

**Fig. 4. *Ph-sim* RNAi causes dorsalization of embryonic trunk.** Nuclei were counterstained with DAPI (blue) and a false-color overlay of gene expression patterns was generated. Where appropriate, the second antennal (A2) or mandibular (Mn) segments are labeled. **(A)** *Ph-Dll-e* expression in wild-type embryo. **(B)** Most *Ph-sim* RNAi embryos (44 out of 49) lack *Ph-Dll-e* expression posterior to A2. **(C)** Some *Ph-sim* RNAi embryos (4 out of 49) show a more moderate phenotype in which one or more trunk segments contain ventrally fused *Ph-Dll-e* spots. **(D)** Midline ablated embryo (from Fig. 1E) showing ventrally fused *Ph-Dll-e* spots, similar to the phenotype shown in C. **(E)** Wild-type *Ph-Pax3/7-1* expression in a subset of presumptive neuroectodermal cells. **(F)** *Ph-sim* RNAi embryos lack *Ph-Pax3/7-1* expression posterior to A2 (18 out of 18). **(G)** Wild-type *Ph-hh* expression in segmentally reiterated stripes. **(H)** *Ph-sim* RNAi embryos show relatively normal *Ph-hh* expression (16 out of 16). Decreased width of *Ph-hh* stripes is attributed to the dorsalized germ band of these embryos. **(I)** Wild-type expression of *Ph-Eve* in a stage 19 embryo. Protein is detected in dorsal mesoderm (arrowhead), developing neurogenic ectoderm (arrow) and posterior ectoderm. **(J)** In *Ph-sim* RNAi embryos, mesodermal *Ph-Eve* is expressed ectopically in ventral mesoderm suggesting embryonic dorsalization. Neurogenic staining is no longer visible as a result of deletion of this tissue. **(K)** Magnification of the eight mesodermal cells comprising one hemisegment in stage 18 wild-type embryo. Ventral midline is oriented to the left. *Ph-Eve* is expressed in the m4a cell. **(L)** Magnification of one hemisegment in *Ph-sim* RNAi embryo. Ventral midline is oriented to the left. *Ph-Eve* is now detected in all four anterior mesodermal cells (m1a-m4a). **(M)** Wild-type *Ph-sog* expression in a stage 15 embryo. The highest levels of expression are seen in anterior midline cells in the Mn segment. No *Ph-sog* expression is detected in the majority of trunk midline cells.

cells in the branchiopod crustacean *Artemia franciscana* (Akiyama-Oda and Oda, 2006). We therefore considered *sog* to be a strong candidate for mediating midline function in *Parhyale*, and cloned the *Parhyale* ortholog of this gene (*Ph-sog*). We were able to detect *Ph-sog* transcript in midline cells in *Parhyale*, but, surprisingly, it was restricted to a group of midline cells in the anterior, primarily in the presumptive mandibular segment. Posterior to this, no localized expression was observed in the midline (Fig. 4M). Furthermore, *Ph-sog* knockdown was attempted via embryonic siRNA injection, but this failed to generate the dorsalization phenotype seen in *Ph-sim* RNAi embryos (Table 1).

## DISCUSSION

### *Parhyale* midline cells pattern surrounding tissue

This work provides the first functional study of *sim* and the ventral midline in a non-insect arthropod system. We show that within the ectodermal grid of *Parhyale*, the relative distance of a cell from the ventral midline is the primary determinant of its eventual DV fate. This long-range patterning function of the midline is

analogous to vertebrate structures such as the Spemann organizer and the floor plate of the CNS (Harland and Gerhart, 1997; Placzek and Briscoe, 2005). Interestingly, there appears to be no single structure in the insect embryo that is as prominently required for patterning the DV axis. Furthermore, we consider this to be strong evidence that the ventral midline of *Parhyale* secretes one or more morphogenic proteins that are capable of patterning the surrounding tissue. In *Drosophila*, the ventral midline produces two distinct secreted signals: the BMP antagonist Sog and the EGF ligand Spitz. Although it has been shown that *Drosophila Egrf* (*DER*) mutants show aberrant expression of *Dll* (Kubota et al., 2000), EGF signaling alone is unlikely to explain the complete loss of ventral and lateral ectoderm in *Ph-sim* RNAi embryos. For example, various *Drosophila* mutations that interfere with Spitz signaling cause defects in proper neuroblast delamination and fate specification, but still contain neurogenic ectoderm (Chang et al., 2000). Instead, the dorsalization phenotype appears to be more consistent with a loss of BMP antagonism in ventral tissues.

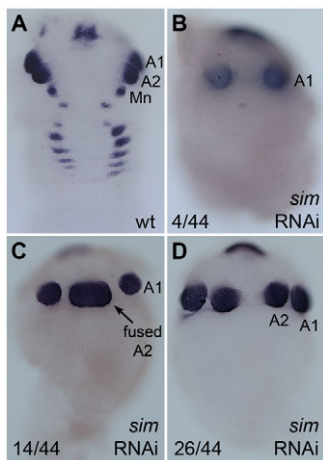

**Fig. 5. Head morphology variations in *sim* RNAi embryos.** Where appropriate, the first and second antennal (A1, A2) and mandibular (Mn) segments are labeled (A) *Ph-Dll-e* expression in wild-type embryo. (B) In 4 out of 44 embryos showing a severe DV phenotype, the A2 appendages are completely missing. (C) In 14 out of 44 embryos, DV patterning in A2 is moderately affected leading to a single, ventrally fused appendage bud (arrow). (D) In 26 out of 44 embryos, DV patterning in the A2 segment is minimally affected and appendage buds appear distinctly separate (same embryo as shown in Fig. 4B).

Our data argue against the idea that *Ph-sog* alone is responsible for mediating the function of the *Parhyale* midline. However, it is likely that additional BMP antagonists are present in *Parhyale* and that these might be key factors in mediating the developmental role of midline cells. DV patterning in vertebrates, for example, involves multiple secreted BMP antagonists and *Tribolium* contains orthologs to many of these vertebrate BMP antagonists that are not present in the *Drosophila* genome (Little and Mullins, 2006; Van der Zee et al., 2008). It would, therefore, be interesting to characterize additional BMP antagonists in *Parhyale* in order to determine whether they contribute to the function of midline cells.

Although we were able to generate dorsalization phenotypes in embryos through either laser ablation of midline cells or *Ph-sim* RNAi, the DV phenotype observed in *Ph-sim* RNAi embryos was more severe (Fig. 6). We believe that this was a result of the timing of the loss of midline function; laser ablation of midline cells is performed after the cells have been present (and presumably functional) in the germ band for several hours. By contrast, *Ph-sim* RNAi prevents the formation of midline altogether. We therefore predict that the latter represents the true loss of midline phenotype in *Parhyale*, and that the difference in phenotypic severity suggests that the timing and/or duration of signaling from the midline contribute to differential fates along the DV axis.

Finally, *Ph-sim* RNAi generated a dramatic DV phenotype in the *Parhyale* trunk, but the first antennal segment was typically unaffected, and the second antennal segment was dorsalized with lower penetrance and varying degrees of severity. This is consistent with the observation that the ventral midline does not extend into the first antennal segment and that *Ph-sim* is only expressed in the second antennal segment later in development (stage 16). Because these anterior segments are the first to form in the embryo, it is possible that midline cells function by propagating existing DV patterning information to newly formed body segments, using anterior segments as a template. However, the mechanism for generating DV pattern in the anterior-most segments of *Parhyale* remains unclear.

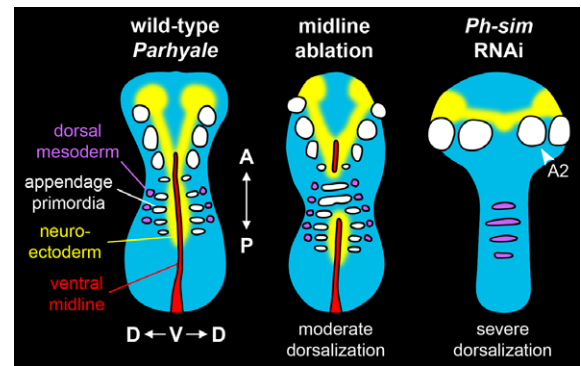

**Fig. 6. Dorsalization phenotypes.** Wild-type, midline-ablated, and *Ph-sim* RNAi embryos are depicted. In midline-ablated embryos, segments lacking midline failed to generate neuroectoderm and ventral cells were mis-specified as lateral ectoderm (bearing appendage primordia). The location of dorsal mesoderm in midline-ablated embryos was not examined, but is inferred from ectodermal markers. In *Ph-sim* RNAi embryos, the ventral midline, neuroectoderm and appendage primordia were absent posterior to the second antennal segment (A2). Dorsalization was confirmed by the presence of dorsal mesoderm in ventral regions of embryos.

### Evolution of midline function and DV patterning in arthropods

It has previously been argued that the ventral midline in *Parhyale* and *Drosophila* are homologous structures (Simanton et al., 2009). The experimental results showing that *Ph-sim* specifies the midline fate in *Parhyale* supports this idea and further suggests that this developmental role of *sim* dates back to at least the last common ancestor of insects and malacostracan crustaceans. Furthermore, expression of *At-sim* in the midline of *Achaearanea* and in ventrally located cell clusters in *Platynereis* indicates that this might be a plesiomorphy of all protostomes (Akiyama-Oda and Oda, 2006; Denes et al., 2007).

How could the seemingly disparate roles of *Parhyale* and *Drosophila* midline cells in DV axis patterning have evolved? We hypothesize that the common ancestor used ventral midline cells as a localized source of secreted BMP antagonists, including *sog*, and that these cells played an ancestral role in patterning the DV axis. The fact that midline function in *Parhyale* does not appear to be mediated by *Ph-sog* could be explained if there were multiple midline-associated BMP antagonists present in the common ancestor. If this were true, the lack of *Ph-sog* in the majority of *Parhyale* midline cells could simply be a derived feature (apomorphy) of this lineage, as it appears to be retained in both *Artemia* and *Drosophila*.

Furthermore, it has been theorized that the evolution of holometabolous insects has been accompanied by a functional shift in which Toll signaling and the Dorsal activity gradient have gradually replaced BMP signaling as the primary determinants of DV axis formation (Nunes da Fonseca et al., 2008). We propose that once Dorsal assumed regulatory control of *sog* in the insect lineage, it would have bypassed the ancestral requirement of the ventral midline as a discrete source of BMP antagonists. Consequently, the ventral midline in insects could have evolved to play a more restricted role in DV patterning. This would explain the fact that no functional role for *sog* in the

*Drosophila* midline has been described. Implicitly, we would also expect that Dorsal plays only a small role, if any, in the DV patterning of crustaceans such as *Parhyale*. This work provides an important step towards understanding the evolution of DV patterning in arthropods. However, further analysis of the function of ventral midline cells and BMP antagonists in additional arthropod systems will be required to test our predictions and to gain further insight into ancestral DV patterning mechanisms.

#### Acknowledgements

We thank Melinda Modrell for supplying the *Hsp70-DsRed-NLS* animal line, Elaine Kwan for generating the Ph-Eve antibody, and Henrique Marques-Souza, Mike Perry and Crystal Chaw for helpful comments on the manuscript. N.H.P. is an Investigator of the Howard Hughes Medical Institute. Deposited in PMC for release after 6 months.

#### Competing interests statement

The authors declare no competing financial interests.

#### Supplementary material

Supplementary material for this article is available at <http://dev.biologists.org/lookup/suppl/doi:10.1242/dev.055160/-DC1>

#### References

- Akiyama-Oda, Y. and Oda, H.** (2006). Axis specification in the spider embryo: dpp is required for radial-to-axial symmetry transformation and sog for ventral patterning. *Development* **133**, 2347-2357.
- Browne, W. E., Price, A. L., Gerberding, M. and Patel, N. H.** (2005). Stages of embryonic development in the amphipod crustacean, *Parhyale hawaiiensis*. *Genesis* **42**, 124-149.
- Browne, W. E., Schmid, B. G., Wimmer, E. A. and Martindale, M. Q.** (2006). Expression of otd orthologs in the amphipod crustacean, *Parhyale hawaiiensis*. *Dev. Genes Evol.* **216**, 581-595.
- Brusca, R. C. and Brusca, G. J.** (2003). *Invertebrates*. Sunderland, MA: Sinauer Associates.
- Chang, J., Kim, I. O., Ahn, J. S., Kwon, J. S., Jeon, S. H. and Kim, S. H.** (2000). The CNS midline cells coordinate proper cell cycle progression and identity determination of the *Drosophila* ventral neuroectoderm. *Dev. Biol.* **227**, 307-323.
- Crews, S. T., Thomas, J. B. and Goodman, C. S.** (1988). The *Drosophila* single-minded gene encodes a nuclear protein with sequence similarity to the per gene product. *Cell* **52**, 143-151.
- Davis, G. K., D'Alessio, J. A. and Patel, N. H.** (2005). Pax3/7 genes reveal conservation and divergence in the arthropod segmentation hierarchy. *Dev. Biol.* **285**, 169-184.
- Denes, A. S., Jékely, G., Steinmetz, P. R., Raible, F., Snyman, H., Prud'homme, B., Ferrier, D. E., Balavoine, G. and Arendt, D.** (2007). Molecular architecture of annelid nerve cord supports common origin of nervous system centralization in bilateria. *Cell* **129**, 277-288.
- Doe, C. Q., Chu-LaGriff, Q., Wright, D. M. and Scott, M. P.** (1991). The prospero gene specifies cell fates in the *Drosophila* central nervous system. *Cell* **65**, 451-464.
- Duman-Scheel, M. and Patel, N. H.** (1999). Analysis of molecular marker expression reveals neuronal homology in distantly related arthropods. *Development* **126**, 2327-2334.
- Francois, V., Solloway, M., O'Neill, J. W., Emery, J. and Bier, E.** (1994). Dorsal-ventral patterning of the *Drosophila* embryo depends on a putative negative growth factor encoded by the short gastrulation gene. *Genes Dev.* **8**, 2602-2616.
- Frasch, M., Hoey, T., Rushlow, C., Doyle, H. and Levine, M.** (1987). Characterization and localization of the even-skipped protein of *Drosophila*. *EMBO J.* **6**, 749-759.
- Gerberding, M. and Scholtz, G.** (1999). Cell lineage of the midline cells in the amphipod crustacean *Orchestia cavimana* (Crustacea, Malacostraca) during formation and separation of the germ band. *Dev. Genes Evol.* **209**, 91-102.
- Gerberding, M., Browne, W. E. and Patel, N. H.** (2002). Cell lineage analysis of the amphipod crustacean *Parhyale hawaiiensis* reveals an early restriction of cell fates. *Development* **129**, 5789-5801.
- Golembo, M., Raz, E. and Shilo, B. Z.** (1996). The *Drosophila* embryonic midline is the site of Spitz processing, and induces activation of the EGF receptor in the ventral ectoderm. *Development* **122**, 3363-3370.
- Harland, R.** (2000). Neural induction. *Curr. Opin. Genet. Dev.* **10**, 357-362.
- Harland, R. and Gerhart, J.** (1997). Formation and function of Spemann's organizer. *Annu. Rev. Cell Dev. Biol.* **13**, 611-667.
- Holley, S. A., Jackson, P. D., Sasai, Y., Lu, B., De Robertis, E. M., Hoffmann, F. M. and Ferguson, E. L.** (1995). A conserved system for dorsal-ventral patterning in insects and vertebrates involving sog and chordin. *Nature* **376**, 249-253.
- Jiang, J., Rushlow, C. A., Zhou, Q., Small, S. and Levine, M.** (1992). Individual dorsal morphogen binding sites mediate activation and repression in the *Drosophila* embryo. *EMBO J.* **11**, 3147-3154.
- Kasai, Y., Nambu, J. R., Lieberman, P. M. and Crews, S. T.** (1992). Dorsal-ventral patterning in *Drosophila*: DNA binding of snail protein to the single-minded gene. *Proc. Natl. Acad. Sci. USA* **89**, 3414-3418.
- Kosman, D., Ip, Y. T., Levine, M. and Arora, K.** (1991). Establishment of the mesoderm-neuroectoderm boundary in the *Drosophila* embryo. *Science* **254**, 118-122.
- Kubota, K., Goto, S., Eto, K. and Hayashi, S.** (2000). EGF receptor attenuates Dpp signaling and helps to distinguish the wing and leg cell fates in *Drosophila*. *Development* **127**, 3769-3776.
- Leptin, M.** (1991). twist and snail as positive and negative regulators during *Drosophila* mesoderm development. *Genes Dev.* **5**, 1568-1576.
- Little, S. C. and Mullins, M. C.** (2006). Extracellular modulation of BMP activity in patterning the dorsoventral axis. *Birth Defects Res. C Embryo Today* **78**, 224-242.
- Liubicich, D. M., Serano, J. M., Pavlopoulos, A., Kontarakis, Z., Protas, M. E., Kwan, E., Chatterjee, S., Tran, K. D., Averof, M. and Patel, N. H.** (2009). Knockdown of *Parhyale* Ultrabithorax recapitulates evolutionary changes in crustacean appendage morphology. *Proc. Natl. Acad. Sci. USA* **106**, 13892-13896.
- Mayer, U. and Nüsslein-Volhard, C.** (1988). A group of genes required for pattern formation in the ventral ectoderm of the *Drosophila* embryo. *Genes Dev.* **2**, 1496-1511.
- Morel, V. and Schweisguth, F.** (2000). Repression by suppressor of hairless and activation by Notch are required to define a single row of single-minded expressing cells in the *Drosophila* embryo. *Genes Dev.* **14**, 377-388.
- Nambu, J. R., Lewis, J. O., Wharton, K. A. and Crews, S. T.** (1991). The *Drosophila* single-minded gene encodes a helix-loop-helix protein that acts as a master regulator of CNS midline development. *Cell* **67**, 1157-1167.
- Nunes da Fonseca, R., von Levetzow, C., Kalscheuer, P., Basal, A., van der Zee, M. and Roth, S.** (2008). Self-regulatory circuits in dorsoventral axis formation of the short-germ beetle *Tribolium castaneum*. *Dev. Cell* **14**, 605-615.
- Oliver, G., Sosa-Pineda, B., Geisendorf, S., Spana, E. P., Doe, C. Q. and Gruss, P.** (1993). Prox 1, a prospero-related homeobox gene expressed during mouse development. *Mech. Dev.* **44**, 3-16.
- Panganiban, G., Sebring, A., Nagy, L. and Carroll, S.** (1995). The development of crustacean limbs and the evolution of arthropods. *Science* **270**, 1363-1366.
- Pavlopoulos, A. and Averof, M.** (2005). Establishing genetic transformation for comparative developmental studies in the crustacean *Parhyale hawaiiensis*. *Proc. Natl. Acad. Sci. USA* **102**, 7888-7893.
- Placzek, M. and Briscoe, J.** (2005). The floor plate: multiple cells, multiple signals. *Nat. Rev. Neurosci.* **6**, 230-240.
- Price, A. L. and Patel, N. H.** (2008). Investigating divergent mechanisms of mesoderm development in arthropods: the expression of Ph-twist and Ph-mef2 in *Parhyale hawaiiensis*. *J. Exp. Zool. B Mol. Dev. Evol.* **310**, 24-40.
- Price, A. L., Modrell, M. S., Hannibal, R. L. and Patel, N. H.** (2010). Mesoderm and ectoderm lineages in the crustacean *Parhyale hawaiiensis* display intra-germ layer compensation. *Dev. Biol.* **341**, 256-266.
- Rehm, E. J., Hannibal, R. L., Chaw, R. C., Vargas-Vila, M. A. and Patel, N. H.** (2009). The Crustacean *Parhyale hawaiiensis*: a new model for arthropod development. *Cold Spring Harbor Protoc.* **2009**, pdb.emo114.
- Roth, S., Stein, D. and Nüsslein-Volhard, C.** (1989). A gradient of nuclear localization of the dorsal protein determines dorsoventral pattern in the *Drosophila* embryo. *Cell* **59**, 1189-1202.
- Simanton, W., Clark, S., Clemons, A., Jacowski, C., Farrell-VanZomeran, A., Beach, P., Browne, W. E. and Duman-Scheel, M.** (2009). Conservation of arthropod midline netrin accumulation revealed with a cross-reactive antibody provides evidence for midline cell homology. *Evol. Dev.* **11**, 260-268.
- Stathopoulos, A., Van Drenth, M., Erives, A., Markstein, M. and Levine, M.** (2002). Whole-genome analysis of dorsal-ventral patterning in the *Drosophila* embryo. *Cell* **111**, 687-701.
- Thomas, J. B., Crews, S. T. and Goodman, C. S.** (1988). Molecular genetics of the single-minded locus: a gene involved in the development of the *Drosophila* nervous system. *Cell* **52**, 133-141.
- Van der Zee, M., Stockhammer, O., von Levetzow, C., Nunes da Fonseca, R. and Roth, S.** (2006). Sog/Chordin is required for ventral-to-dorsal Dpp/BMP transport and head formation in a short germ insect. *Proc. Natl. Acad. Sci. USA* **103**, 16307-16312.
- Van der Zee, M., da Fonseca, R. N. and Roth, S.** (2008). TGFbeta signaling in *Tribolium*: vertebrate-like components in a beetle. *Dev. Genes Evol.* **218**, 203-213.
- Xiao, H., Hrdlicka, L. A. and Nambu, J. R.** (1996). Alternate functions of the single-minded and rhomboid genes in development of the *Drosophila* ventral neuroectoderm. *Mech. Dev.* **58**, 65-74.
- Zinzen, R. P., Cande, J., Ronshaugen, M., Papatsenko, D. and Levine, M.** (2006). Evolution of the ventral midline in insect embryos. *Dev. Cell* **11**, 895-902.
